# Supplementary material
Source: PubMed Central journal article supplement (PMC8396109)
Supplement: NIHMS1733638-supplement-Supplementary_results.pdf [file NIHMS1733638-supplement-Supplementary_results.pdf]

## Supplementary Results

**Figure S1: All 21 symptom-response maps derived from the discovery BDI dataset**

**Figure S2: Clustering was significantly better for real data than for three control analyses.** Left panels depict Fisher-transformed cross correlogram to show the spatial correlation between symptom-based circuit maps (diagonals are depicted in black). Middle panels depict a force-directed graph visualization produced in Gephi 0.9.2. In this algorithm, the correlation between nodes is treated as an attractive force, so highly correlated nodes are in close proximity to one another. Node sizes are proportional to the normalized PageRank score(2), a metric of the degree to which that node contributes to the solution. Distinct colors represent distinct clusters. Right panels represent variance explained by the clustering solution, as quantified by the gap statistic(4). **(a)** Individual symptom-based circuit maps were strongly correlated or anti-correlated with one another (left panel). Symptoms thus separated into two distinct clusters which explained 73% of the variance. **(b)** When repeating the analysis with baseline symptoms instead of symptom change, the cross-correlogram revealed a continuous pattern rather than two discrete clusters. A two-cluster solution explained only 25% of the variance. **(c)** Clustering is not evident based on symptom improvement alone. **(d)** Permutation testing showed that clusters generated by random chance are weaker than those generated from the actual data.

**Figure S3: Distributions of cross-correlations between symptom maps.** (a) Across 100 permutations, randomly-shuffled data showed cross-correlations that followed a normal distribution with a peak near zero. (b) The real data followed a skewed distribution with a trough near zero.

**Figure S4: Force-directed graph visualizations depicting the clustering solutions for each dataset.** Visualization follows the same parameters described in Fig. S1.

**Figure S5: Cluster-response maps across different datasets (top: lateral view, bottom: medial view).** Cluster-response maps were reproducible across different symptom scales and independent cohorts.

**Figure S6: Regions of overlap between the two cluster maps.**

**Figure S7: Circuit maps for two-cluster solution generated when using a connectome database of 38 subjects with major depression rather than 1000 healthy controls.**

**Figure S8: Alignment of optimal targets with consensus cortical parcellation schemes.**

**Table S1: Dataset characteristics and patient demographics**

**Table S2: Clustering is not driven by baseline symptoms or overall clinical trajectory.**

In the discovery dataset and the active arm of the replication dataset, clinical improvement was approximately equal between the two symptom clusters. In the sham dataset, dysphoric symptoms improved significantly more than anxiousomatic symptoms. Anxiousomatic symptom improvement was significantly greater in the active replication dataset than in the sham replication dataset. These results are consistent with the fact that the majority of patients in the replication dataset were stimulated at relatively anxiousomatic stimulation sites.

Clinical change in each cluster was not significantly correlated with baseline severity of that cluster in either the discovery dataset or the active arm of the replication dataset. In the sham dataset, clinical improvement was significantly related to baseline severity in the corresponding symptom cluster.

**Table S3: Index of specific symptoms in figure 3a.**

**Table S4: Details of the studies included in the exploratory meta-analysis.**

## Dysphoric cluster

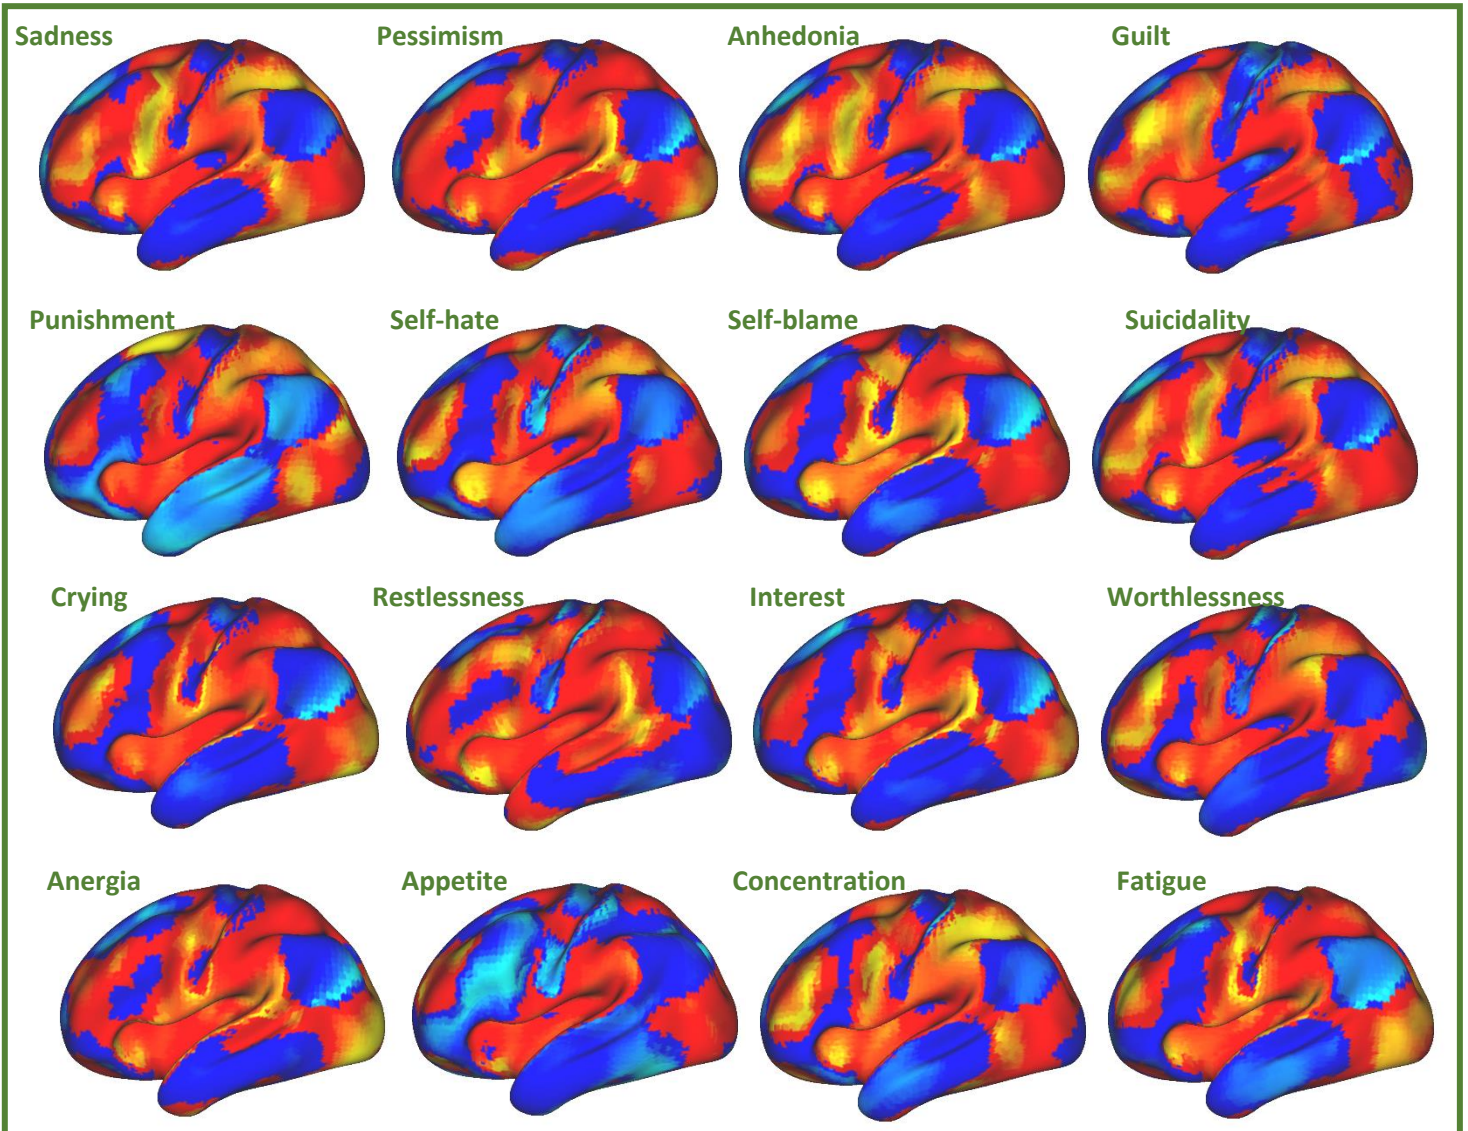

## Anxiosomatic cluster

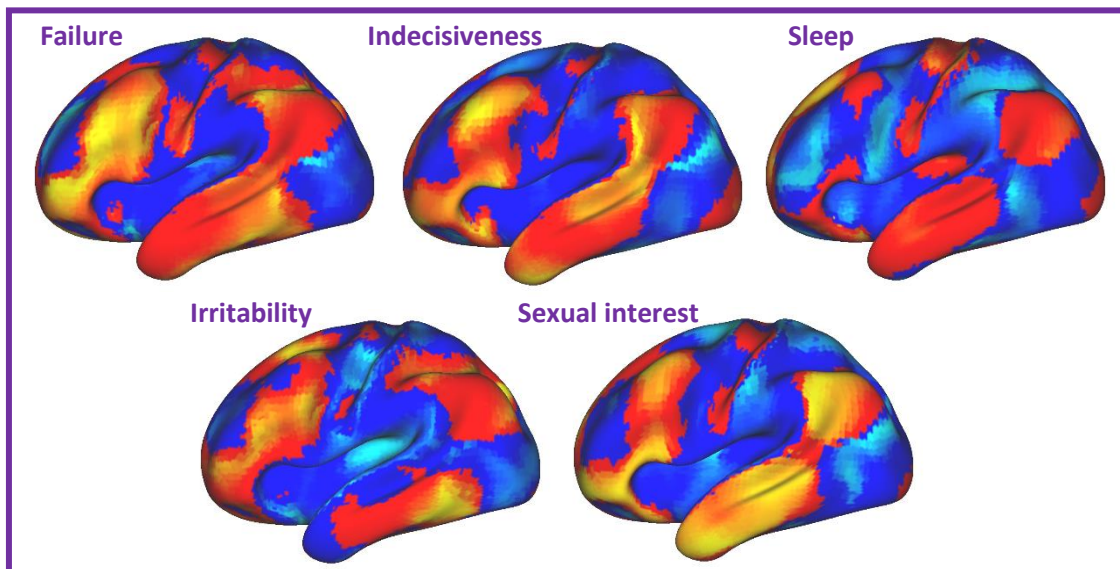

Figure S1: All 21 symptom-response maps derived from the discovery BDI dataset.

(a) Fisher z

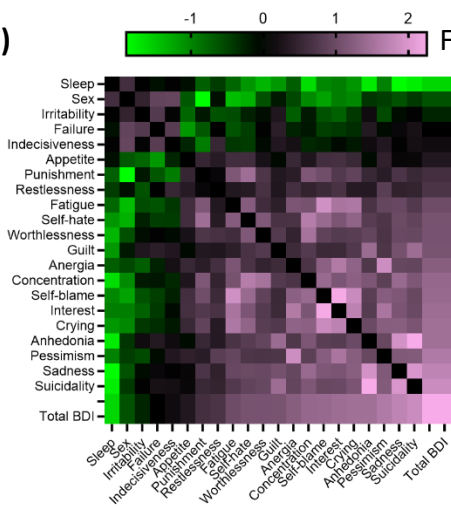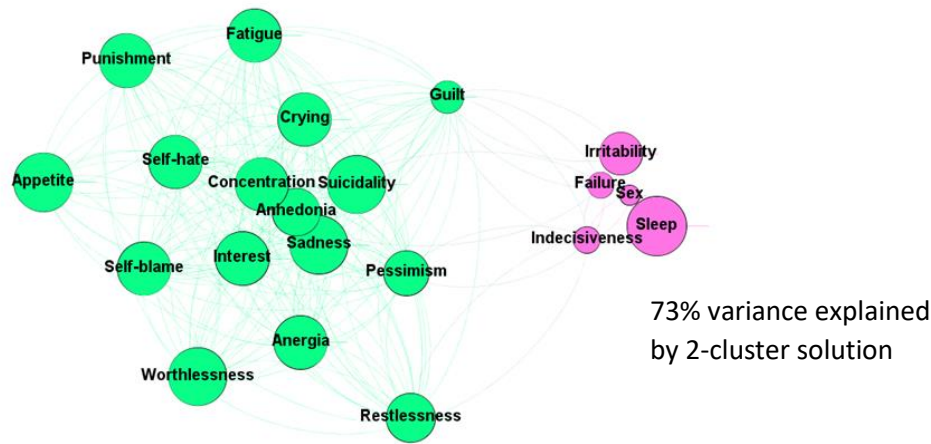

73% variance explained by 2-cluster solution

(b) Unpaired t-test:  $p = 1.0 \times 10^{-12}$

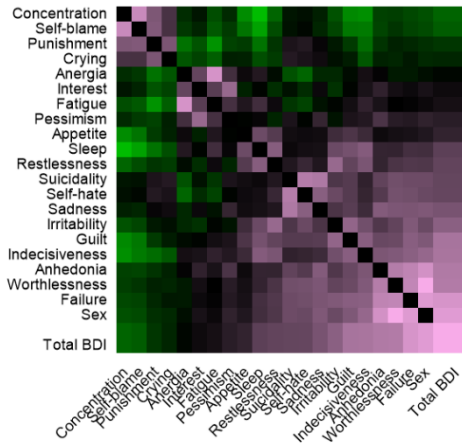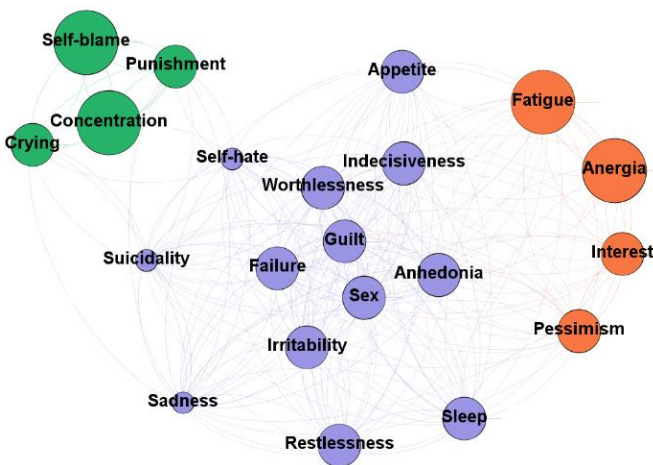

25% variance explained by 2-cluster solution

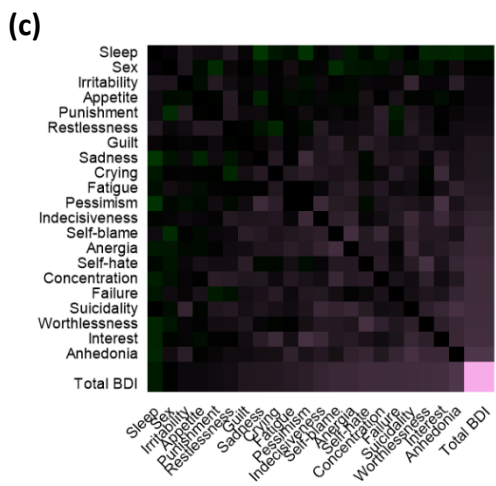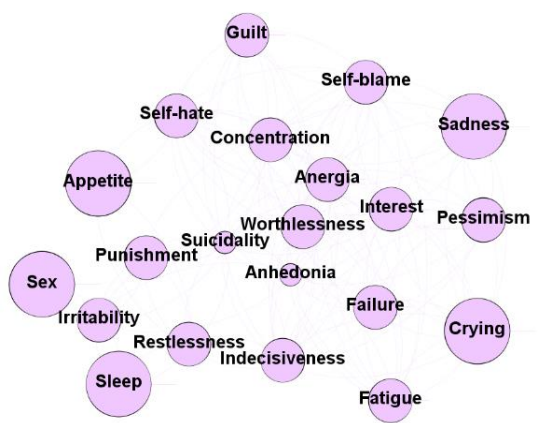

No clustering evident

(d) Permutation test for cluster maps:  $p = 0.005$

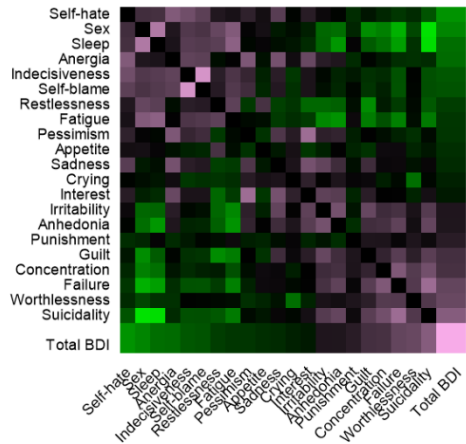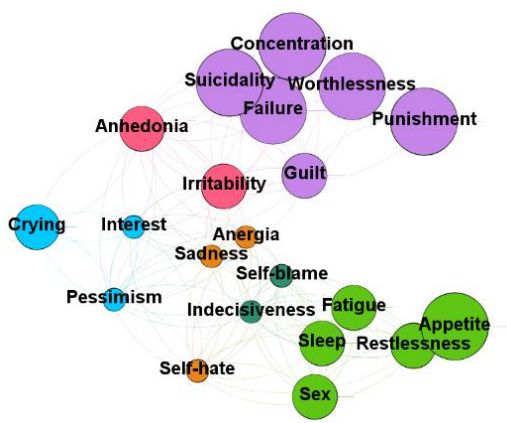

Mean 28% variance explained by 2-cluster solutions ( $p = 0.02$ )

Mean 40% variance explained by "optimal" solutions ( $p = 0.03$ )

Figure S2

(a)

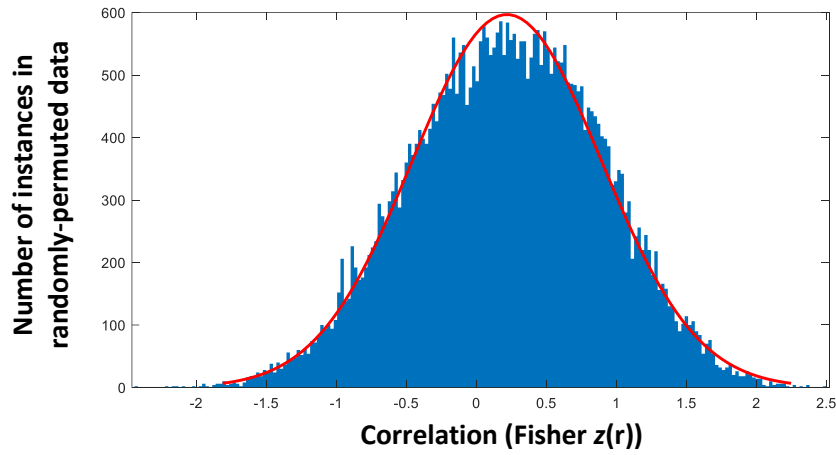

(b)

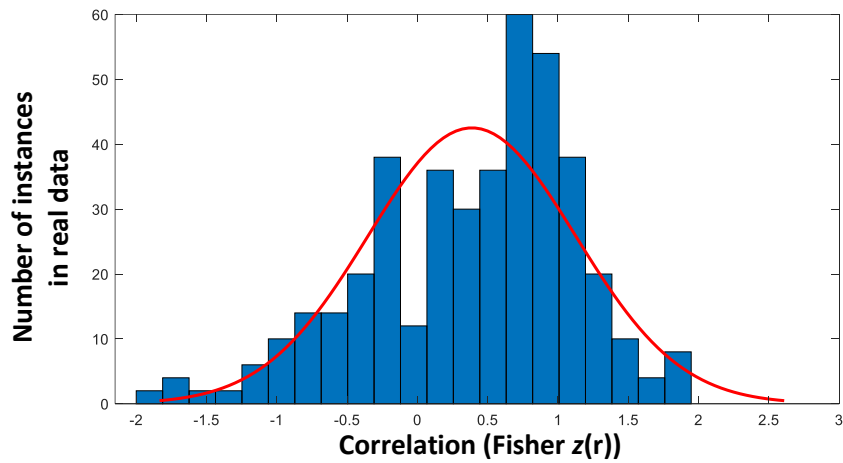

**Figure S3: Distributions of cross-correlations between symptom maps.** (a) Across 100 permutations, randomly-permuted data showed cross-correlations that followed a normal distribution with a peak near zero. (b) The real data followed a skewed distribution with a trough near zero.

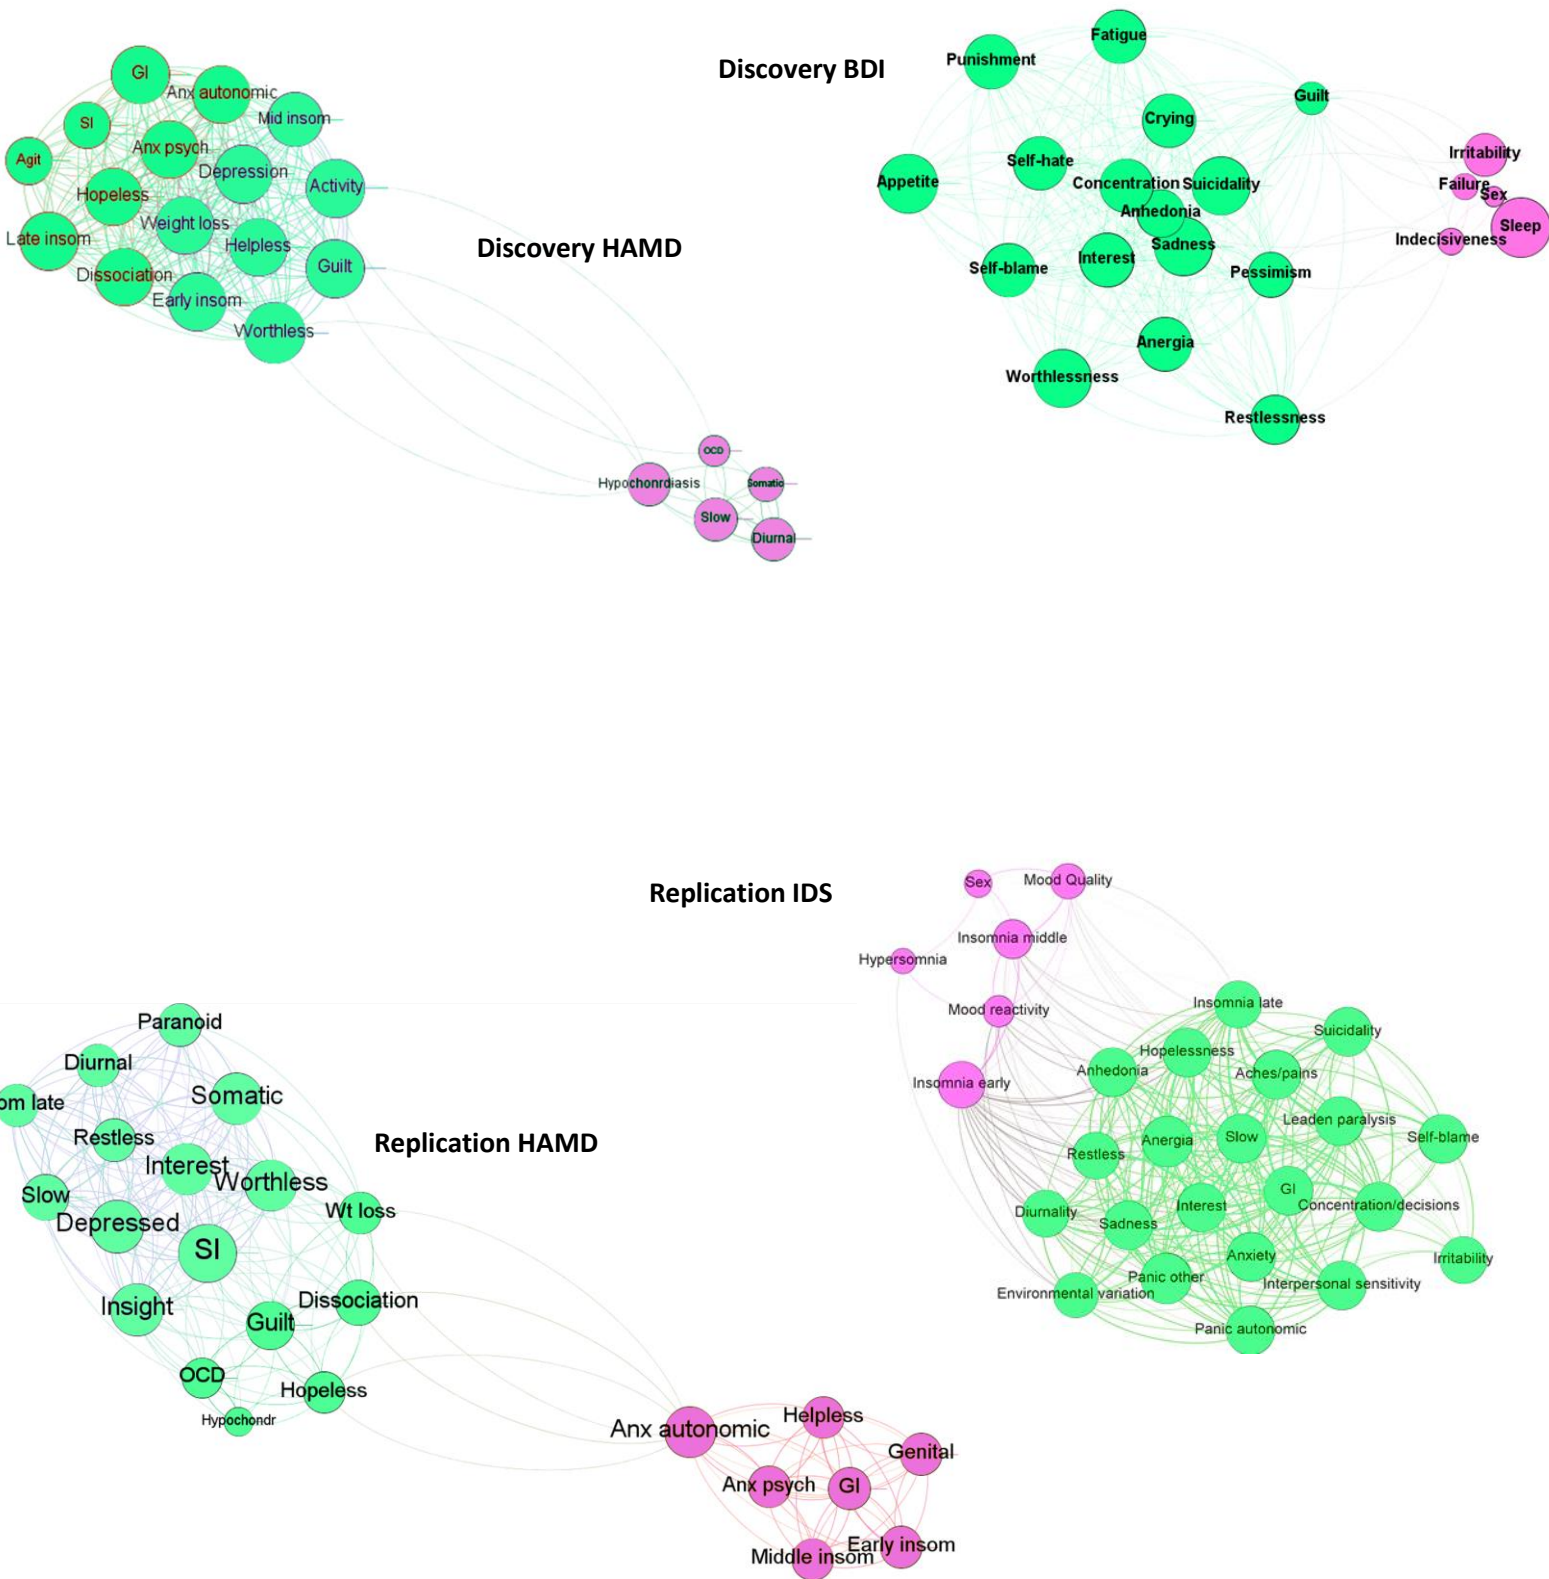

**Figure S4:** Force-directed graph visualizations depicting the clustering solutions for each dataset. Visualizations follow the same parameters described in Fig. S1.

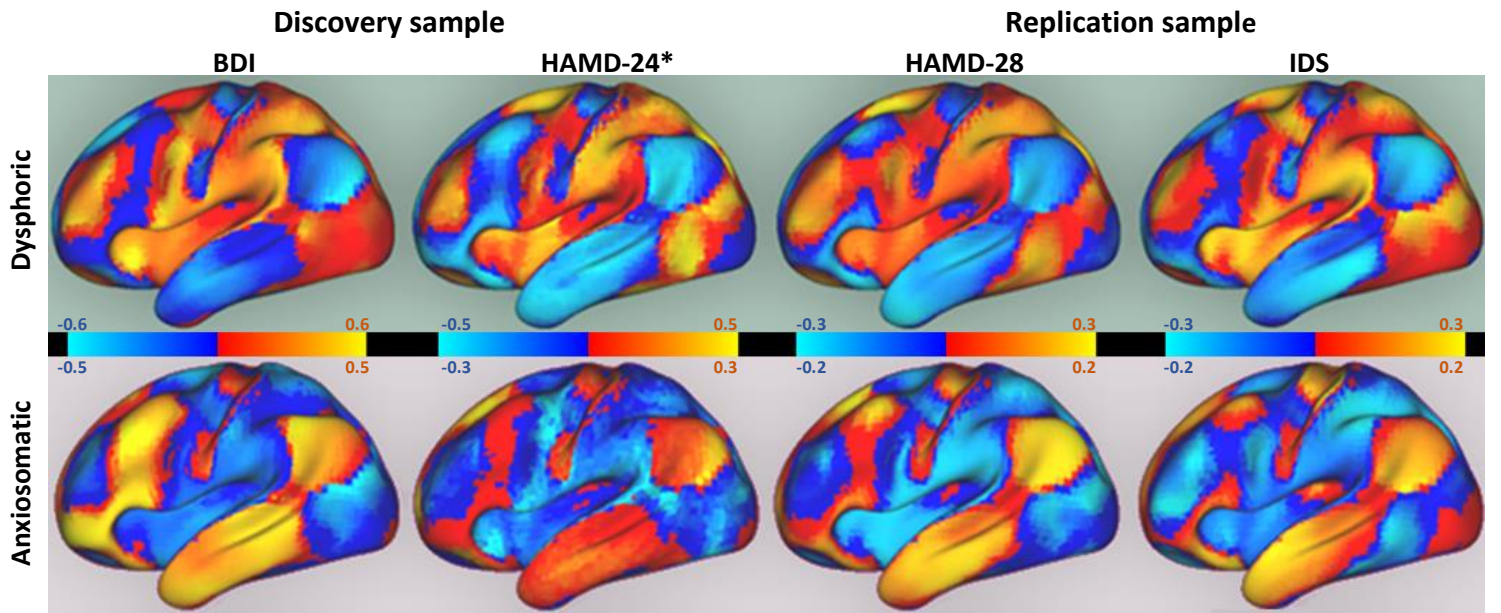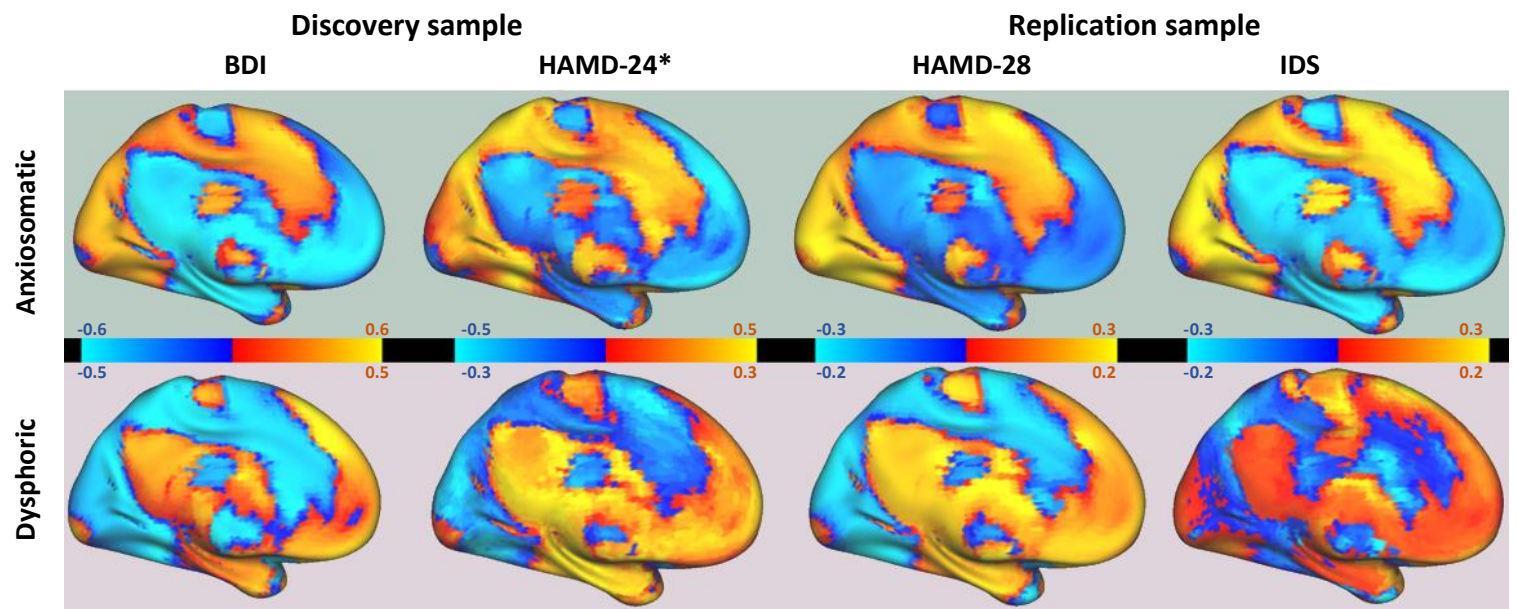

**Figure S5: Cluster-response maps across different datasets** (top: lateral view, bottom: medial view). Cluster-response maps were reproducible across different symptom scales and independent cohorts.

\*Three items in the HAMD-24 (discovery sample, secondary analysis) were omitted from the standard clinical assessment due to clinician judgment. These included Item 14 (genital symptoms), item 17 (insight), and Item 20 (paranoia).

### Positive peaks

| Region                     | Coordinate    |
|----------------------------|---------------|
| Right orbitofrontal cortex | (17, 48, -12) |
| Left DLPFC                 | (-47, 30, 36) |
| Left anterior insula       | (-27, 21, -6) |

### Negative peaks

| Region                    | Coordinate     |
|---------------------------|----------------|
| Right fusiform gyrus      | (22, -36, -18) |
| Right extrastriate cortex | (52, -60, 12)  |
| Left extrastriate cortex  | (-40, -60, 15) |
| Periaqueductal gray       | (0, -32, -6)   |

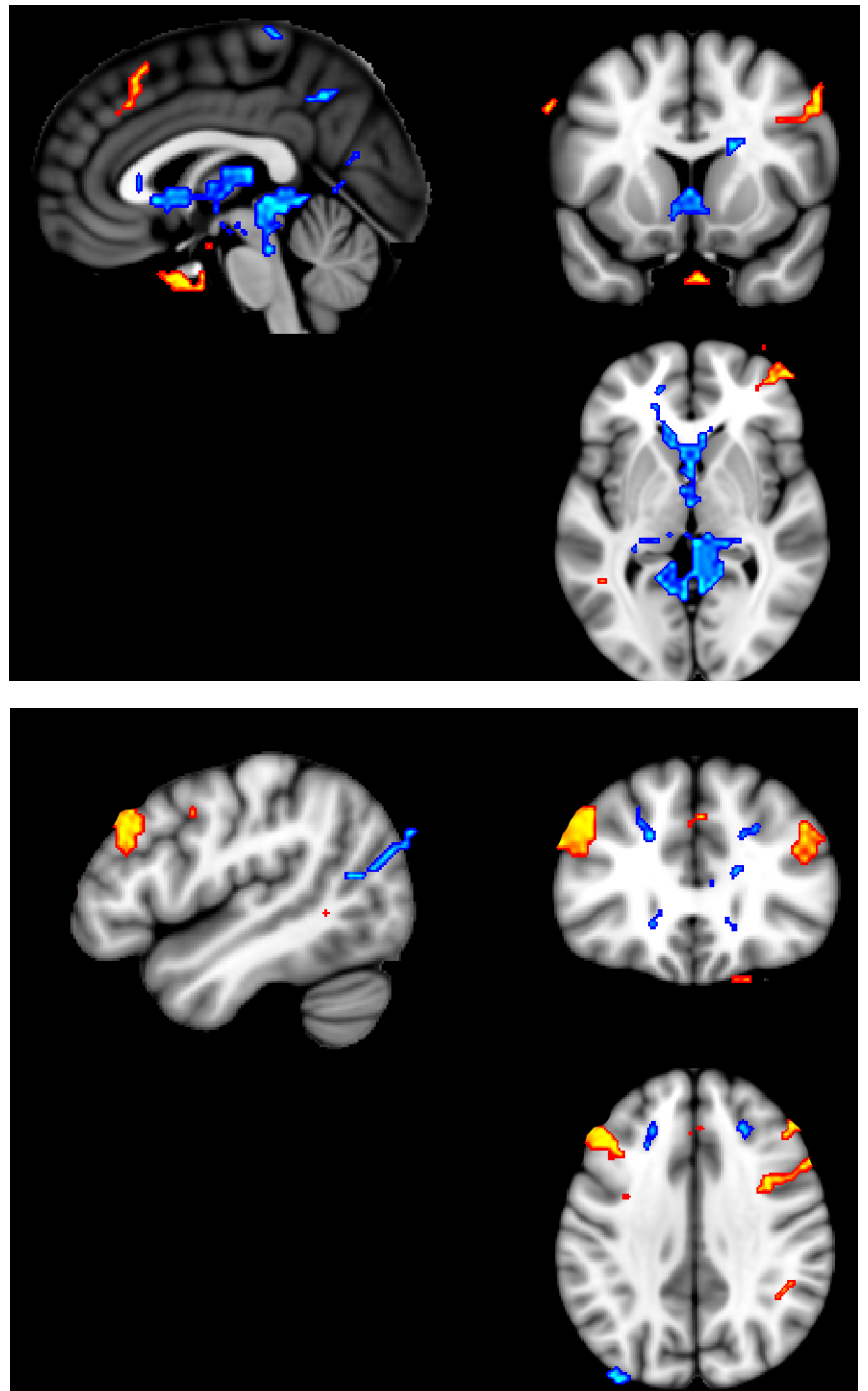

Figure S6: Regions of overlap between the two cluster maps.

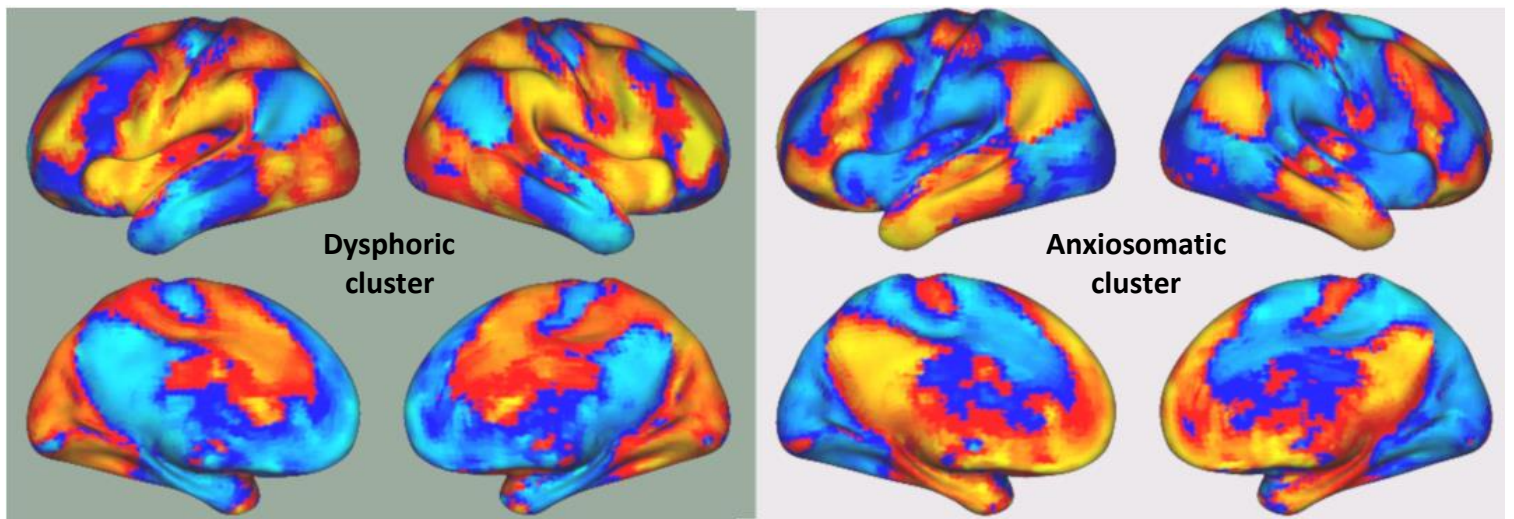

**Figure S7: Two-cluster solution generated when using a connectome database of 38 subjects with major depression rather than 1000 healthy controls.**



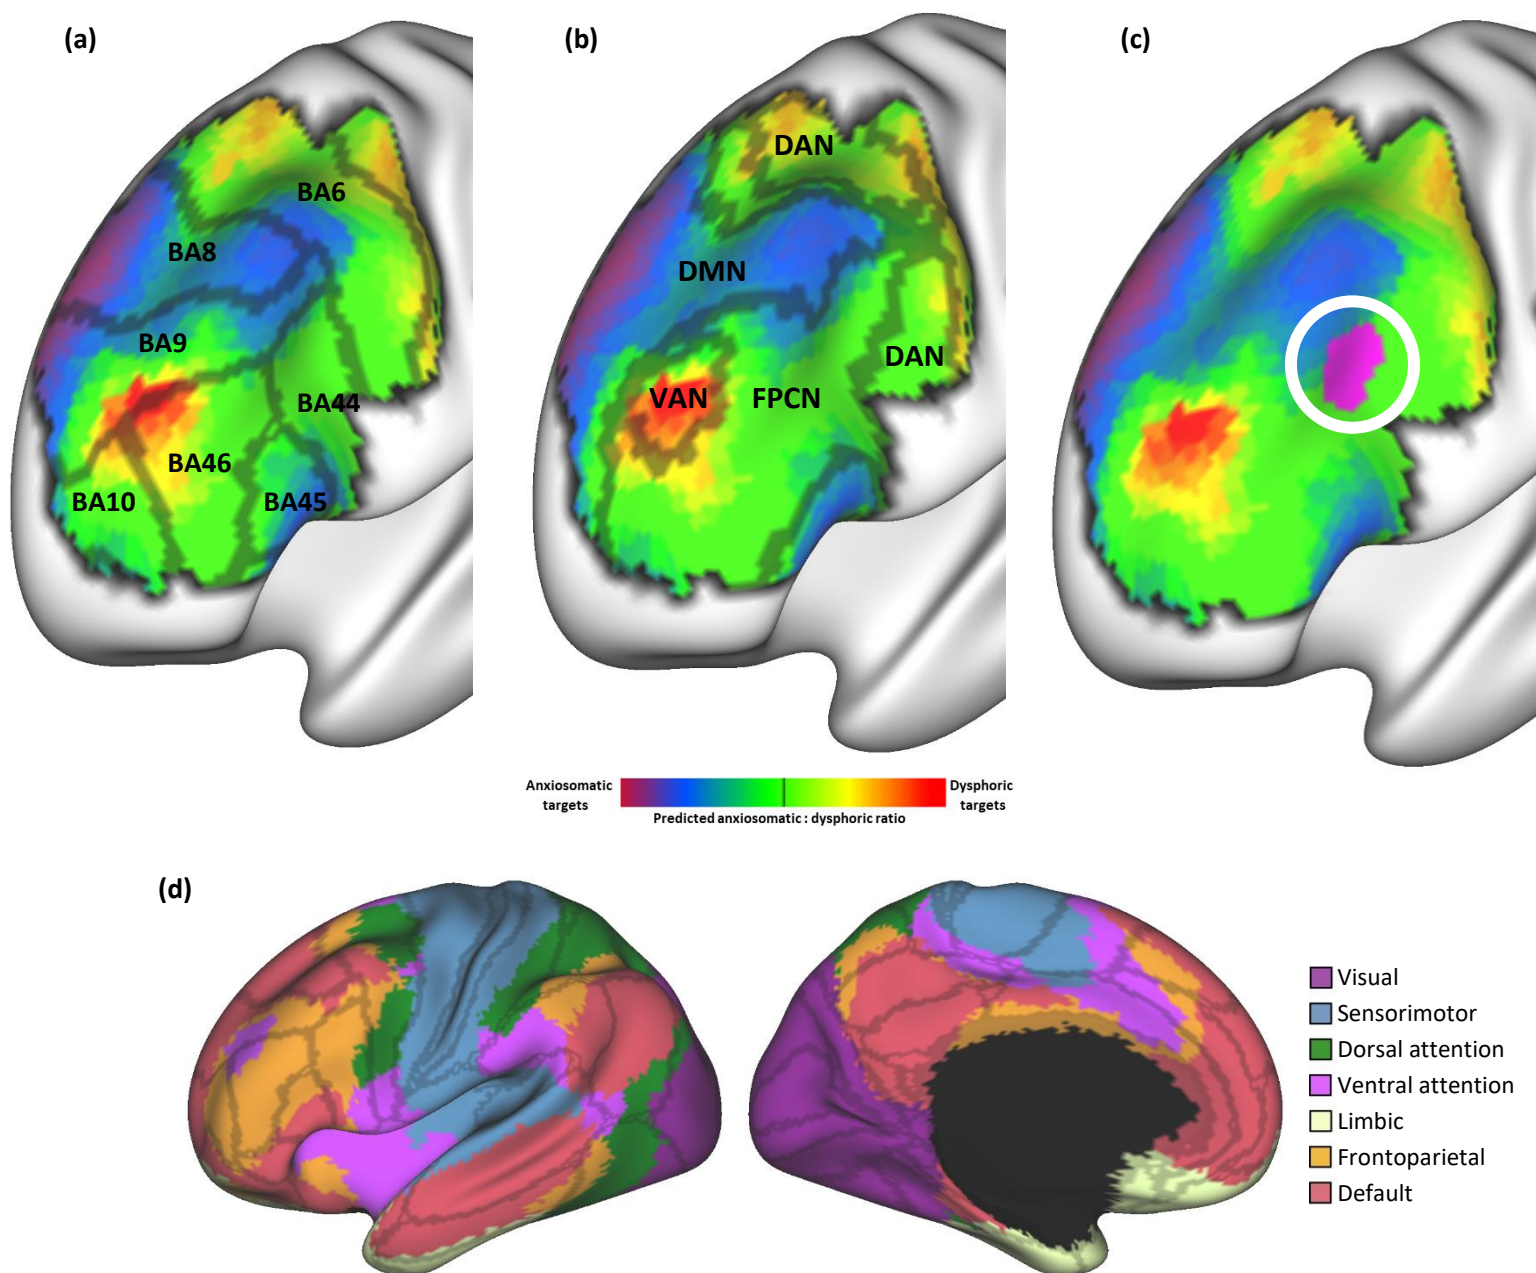

**Figure S8: Alignment of optimal targets with consensus cortical parcellation schemes.**

**(a) Brodmann areas:** The dysphoric target lies at the intersection of Brodmann areas 9, 10, and 46. The anxiosomatic targets lie in Brodmann area 8.

**(b) Yeo parcels(5):** The dysphoric target aligns with the Ventral Attention Network (VAN) parcel, also known as the “cingulo-opercular network” or the “salience network.” Other parts of the dysphoric network also align with the dorsal attention network (DAN). The anxiosomatic target aligns with the default mode network (DMN).

**(c) Lesion network map of depression(6):** A dorsolateral prefrontal site that has been shown to be connected to depression-causing lesions is depicted in magenta. This site was not preferentially connected to either symptom-specific circuit.

**(d)** Surface projection of Yeo parcellation (colors) and Brodmann parcellation (gray lines) for reference.

**Table S1: Dataset characteristics and patient demographics**

|                                               | <b>Discovery</b>                          | <b>Replication</b>          |
|-----------------------------------------------|-------------------------------------------|-----------------------------|
| <b>Sample size</b>                            | 30                                        | 81 active, 87 sham          |
| <b>Treatment device</b>                       | 47% Neuronetics, 53% Magstim              | Neuronetics 2100            |
| <b>Setting</b>                                | Naturalistic                              | Multi-site trial            |
| <b>Targeting method</b>                       | "5.5 cm"                                  | "5 cm"                      |
| <b>Clinical outcomes</b>                      | BDI (primary), HAMD                       | HAMD (primary), IDS         |
| <b>Stimulation site recording procedure</b>   | Stim sites recorded using neuronavigation | Stim site marked during MRI |
| <b>Mean age (range)</b>                       | 53 (24-67)                                | 47 (22-69)                  |
| <b>Gender</b>                                 | 67% female                                | 57% female                  |
| <b>Concomitant antidepressant use</b>         | 100%                                      | 0%                          |
| <b>Mean number of concomitant medications</b> | 3.0                                       | 0                           |

|                                                              |                      | Dysphoric cluster | Anxiosomatic cluster |
|--------------------------------------------------------------|----------------------|-------------------|----------------------|
| Clinical improvement<br>(Mean $\pm$ SD)                      | Discovery            | 47% $\pm$ 24%     | 49% $\pm$ 28%        |
|                                                              | Replication (active) | 14% $\pm$ 36%     | 16% $\pm$ 52%*       |
|                                                              | Replication (sham)   | 13% $\pm$ 26%**   | -4% $\pm$ 77%**      |
| Correlation between<br>baseline and change<br>(Spearman rho) | Discovery            | 0.07 (p = 0.75)   | 0.19 (p = 0.36)      |
|                                                              | Replication (active) | 0.02 (p = 0.84)   | 0.11 (p = 0.32)      |
|                                                              | Replication (sham)   | 0.24 (p = 0.03)   | 0.25 (p = 0.02)      |

\*p<0.05 in comparison with sham (unpaired t-test)

\*\*p<0.05 in comparison with the other cluster (paired t-test)

**Table S2:** Clustering is not driven by differences in baseline symptoms or overall clinical trajectory of patients in each dataset.

In the discovery dataset and the active arm of the replication dataset, clinical improvement was approximately equal between the two symptom clusters. In the sham dataset, dysphoric symptoms improved significantly more than anxiosomatic symptoms. Anxiosomatic symptom improvement was significantly greater in the active replication dataset than in the sham replication dataset. These results are consistent with the fact that the majority of patients in the replication dataset were stimulated at relatively anxiosomatic stimulation sites.

Clinical change in each cluster was not significantly correlated with baseline severity of that cluster in either the discovery dataset or the active arm of the replication dataset. In the sham dataset, clinical improvement was significantly related to baseline severity in the corresponding symptom cluster.

| Discovery cohort          | Replication cohort               |
|---------------------------|----------------------------------|
| 1 BDI Sadness             | 43 IDS Insomnia early            |
| 2 BDI Pessimism           | 44 IDS Insomnia middle           |
| 3 BDI Failure             | 45 IDS Insomnia late             |
| 4 BDI Anhedonia           | 46 IDS Hypersomnia               |
| 5 BDI Guilt               | 47 IDS Sadness                   |
| 6 BDI Punishment          | 48 IDS Irritability              |
| 7 BDI Self-hate           | 49 IDS Anxiety                   |
| 8 BDI Self-blame          | 50 IDS Mood reactivity           |
| 9 BDI Suicidality         | 51 IDS Diurnality                |
| 10 BDI Crying             | 52 IDS Environmental variation   |
| 11 BDI Restlessness       | 53 IDS Mood Quality              |
| 12 BDI Interest           | 54 IDS Concentration/decisions   |
| 13 BDI Indecisiveness     | 55 IDS Self-blame                |
| 14 BDI Worthlessness      | 56 IDS Hopelessness              |
| 15 BDI Anergia            | 57 IDS Suicidality               |
| 16 BDI Sleep              | 58 IDS Interest                  |
| 17 BDI Irritability       | 59 IDS Anergia                   |
| 18 BDI Appetite           | 60 IDS Anhedonia                 |
| 19 BDI Concentration      | 61 IDS Sex                       |
| 20 BDI Fatigue            | 62 IDS Slow                      |
| 21 BDI Sex                | 63 IDS Restless                  |
| 22 HAMD Depression        | 64 IDS Aches/pains               |
| 23 HAMD guilt             | 65 IDS Panic autonomic           |
| 24 HAMD Suicide           | 66 IDS Panic other               |
| 25 HAMD Insomnia early    | 67 IDS GI                        |
| 26 HAMD Insomnia middle   | 68 IDS Interpersonal sensitivity |
| 27 HAMD Insomnia late     | 69 IDS Leaden paralysis          |
| 28 HAMD Activities        | 70 HAMD Depression               |
| 29 HAMD Slowing           | 71 HAMD Guilt                    |
| 30 HAMD Restlessness      | 72 HAMD Suicide                  |
| 31 HAMD Anxiety psychic   | 73 HAMD Insomnia early           |
| 32 HAMD Anxiety autonomic | 74 HAMD Insomnia middle          |
| 33 HAMD Somatic GI        | 75 HAMD Insomnia late            |
| 34 HAMD Somatic general   | 76 HAMD Activities               |
| 35 HAMD Hypochondriasis   | 77 HAMD Slowing                  |
| 36 HAMD Weight loss       | 78 HAMD Restlessness             |
| 37 HAMD Diurnal           | 79 HAMD Anxiety psychic          |
| 38 HAMD Dissociation      | 80 HAMD Anxiety autonomic        |
| 39 HAMD Obsessionality    | 81 HAMD Somatic GI               |
| 40 HAMD Helplessness      | 82 HAMD Somatic general          |
| 41 HAMD Hopelessness      | 83 HAMD Genital                  |
| 42 HAMD Worthlessness     | 84 HAMD Hypochondriasis          |
|                           | 85 HAMD Weight loss              |
|                           | 86 HAMD Insight                  |
|                           | 87 HAMD Diurnality               |
|                           | 88 HAMD Dissociation             |
|                           | 89 HAMD Paranoia                 |
|                           | 90 HAMD Obsessionality           |
|                           | 91 HAMD Helplessness             |
|                           | 92 HAMD Hopelessness             |
|                           | 93 HAMD Worthlessness            |
|                           | 94 HAMD Anergia                  |
|                           | 95 HAMD Hypersomnia              |
|                           | 96 HAMD Increased appetite       |
|                           | 97 HAMD Rejection sensitivity    |

**Table S3:** Index of specific symptoms in figure 3a. Green symptoms fell into the dysphoric cluster, while purple symptoms fell into the anxiosomatic cluster.

|                 | Study              | Target     | Diagnosis/<br>population | <i>n</i> | Mood<br>Scale | Anxiety<br>Scale |
|-----------------|--------------------|------------|--------------------------|----------|---------------|------------------|
| Superficial TMS | Blumberger(7)      | Anti-sgACC | MDD                      | 177      | HAMD          | BSI-A            |
|                 | Carpenter(8)       | Beam F3    | PTSD                     | 35       | IDS-SR        | PSS              |
|                 | Berlim(9)          | EEG F3     | MDD                      | 15       | HAMD          | HAMA             |
|                 | Taylor(10)         | Functional | MDD                      | 16       | MADRS         | GAD-7            |
|                 | Leong(11)          | Left 6cm   | MDD                      | 32       | HAMD          | GAD-7            |
|                 | Downar(12)         | dmPFC      | MDD                      | 47       | BDI           | BAI              |
|                 | Dunlop 1(13)       | dmPFC      | AN/BN                    | 28       | BDI           | BAI              |
|                 | Dunlop 2(14)       | dmPFC      | OCD                      | 20       | BDI           | BAI              |
|                 | Yesavage(15)       | Left 6cm   | MDD                      | 73       | HAMD          | PCL-M            |
|                 | Discovery data     | Left 5.5cm | MDD                      | 30       | Clusters      | Clusters         |
|                 | Replication data   | Left 5cm   | MDD                      | 81       | Clusters      | Clusters         |
|                 | Mansur(16)         | Right 5cm  | OCD                      | 30       | HAMD          | HAMA             |
|                 | Dilkov(17)         | Right 5cm  | GAD                      | 15       | HAMD          | HAMA             |
|                 | Tovar-Perdomo(18)  | Beam F3    | MDD                      | 24       | QIDS-C        | BAI              |
| Deep TMS        | Levkovitz(19)      | Left 5.5cm | MDD                      | 65       | HAMD          | HAMA             |
|                 | Tavares(20)        | Left 6cm   | BPAD                     | 25       | HAMD          | HAMA             |
|                 | Berlim(21)         | Left 6cm   | MDD                      | 17       | HAMD          | HAMA             |
|                 | Kaster(22)         | Left 5.5cm | Geriatric MDD            | 27       | HAMD          | BSI-A            |
|                 | Isserles(23)       | mPFC       | PTSD                     | 9        | HAMD          | CAPS             |
|                 | Rosenberg*(24, 25) | Left 5.5cm | MDD                      | 8        | HAMD          | HAMA             |

#### Diagnoses:

MDD = Major Depressive Disorder  
PTSD = Post-traumatic stress disorder  
AN/BN = Anorexia nervosa and bulimia nervosa  
OCD = Obsessive-compulsive disorder  
GAD = Generalized Anxiety Disorder  
BPAD = Bipolar affective disorder (current episode depressed)

#### Dysphoric scales:

HAMD = Hamilton Rating Scale for Depression  
IDS-SR = Inventory of Depressive Symptoms (self-report)  
MADRS = Montgomery-Asberg Depression Rating Scale  
BDI = Beck Depression Inventory  
Clusters = data-driven clustering  
QIDS-C = Quick Inventory of Depressive Symptoms (clinician-report)

#### Anxiosomatic scales:

BSI-A = Brief Symptom Inventory for Anxiety  
PSS = Perceived Stress Scale  
PCL-M = PTSD Checklist for Military  
CAPS = Clinician-Administered PTSD Scale  
HAMA = Hamilton Rating Scale for Anxiety  
BAI = Beck Anxiety Inventory  
GAD-7 = Generalized Anxiety Disorder 7-item Scale

#### Treatment targets:

Anti-sgACC: MRI neuronavigated coordinate with maximal normative sgACC anti-correlation (Fox et al, 2012)(1)  
"5cm": 5cm anterior to motor cortex  
"5.5cm": 5.5cm anterior to motor cortex  
"6cm": 6cm anterior to motor cortex  
EEG F3: F3 coordinate on standard 10-20 EEG system  
Beam F3: Scalp-based heuristic to estimate location of F3 (Beam et al, 2009)(3)  
dmPFC: Neuronavigated dorsomedial prefrontal coordinate  
mPFC: Scalp-based medial prefrontal target

\*This dataset included two publications from the same center with the same treatment protocol. Data from individual subjects were reported in both publications. Due to the small sample sizes, the studies were combined into a single dataset. Subjects were included in this analysis if they completed the full 4-week treatment protocol.

**Table S4:** Details of the studies included in the exploratory meta-analysis.

## Supplementary references

1. Fox MD, Buckner RL, White MP, Greicius MD, Pascual-Leone A. Efficacy of transcranial magnetic stimulation targets for depression is related to intrinsic functional connectivity with the subgenual cingulate. *Biol Psychiatry*. 2012;72(7):595-603.
2. Ghoshal G, Barabasi AL. Ranking stability and super-stable nodes in complex networks. *Nat Commun*. 2011;2:394.
3. Beam W, Borckardt JJ, Reeves ST, George MS. An efficient and accurate new method for locating the F3 position for prefrontal TMS applications. *Brain Stimul*. 2009;2(1):50-4.
4. Tibshirani R, Walther G, Hastie T. Estimating the number of clusters in a data set via the gap statistic. *Journal of the Royal Statistical Society: Series B (Statistical Methodology)*. 2001;63(2):411-23.
5. Yeo BT, Krienen FM, Sepulcre J, Sabuncu MR, Lashkari D, Hollinshead M, et al. The organization of the human cerebral cortex estimated by intrinsic functional connectivity. *J Neurophysiol*. 2011;106(3):1125-65.
6. Padmanabhan JL, Cooke D, Joutsa J, Siddiqi SH, Ferguson M, Darby RR, et al. A human depression circuit derived from focal brain lesions. *Biological Psychiatry*. 2019.
7. Blumberger DM, Vila-Rodriguez F, Thorpe KE, Feffer K, Noda Y, Giacobbe P, et al. Effectiveness of theta burst versus high-frequency repetitive transcranial magnetic stimulation in patients with depression (THREE-D): a randomised non-inferiority trial. *Lancet*. 2018;391(10131):1683-92.
8. Carpenter LL, Conelea C, Tyrka AR, Welch ES, Greenberg BD, Price LH, et al. 5Hz Repetitive transcranial magnetic stimulation for posttraumatic stress disorder comorbid with major depressive disorder. *J Affect Disord*. 2018;235:414-20.
9. Berlim MT, McGirr A, Beaulieu MM, Turecki G. High frequency repetitive transcranial magnetic stimulation as an augmenting strategy in severe treatment-resistant major depression: a prospective 4-week naturalistic trial. *J Affect Disord*. 2011;130(1-2):312-7.
10. Taylor SF, Ho SS, Abagis T, Angstadt M, Maixner DF, Welsh RC, et al. Changes in brain connectivity during a sham-controlled, transcranial magnetic stimulation trial for depression. *J Affect Disord*. 2018;232:143-51.
11. Leong K, Chan P, Grabovac A, Wilkins-Ho M, Perri M. Changes in mindfulness following repetitive transcranial magnetic stimulation for mood disorders. *Can J Psychiatry*. 2013;58(12):687-91.
12. Downar J, Geraci J, Salomons TV, Dunlop K, Wheeler S, McAndrews MP, et al. Anhedonia and reward-circuit connectivity distinguish nonresponders from responders to dorsomedial prefrontal repetitive transcranial magnetic stimulation in major depression. *Biol Psychiatry*. 2014;76(3):176-85.
13. Dunlop K, Woodside B, Lam E, Olmsted M, Colton P, Giacobbe P, et al. Increases in frontostriatal connectivity are associated with response to dorsomedial repetitive transcranial magnetic stimulation in refractory binge/purge behaviors. *Neuroimage Clin*. 2015;8:611-8.
14. Dunlop K, Woodside B, Olmsted M, Colton P, Giacobbe P, Downar J. Reductions in Cortico-Striatal Hyperconnectivity Accompany Successful Treatment of Obsessive-Compulsive Disorder with Dorsomedial Prefrontal rTMS. *Neuropsychopharmacology*. 2016;41(5):1395-403.
15. Yesavage JA, Fairchild JK, Mi Z, Biswas K, Davis-Karim A, Phibbs CS, et al. Effect of Repetitive Transcranial Magnetic Stimulation on Treatment-Resistant Major Depression in US Veterans: A Randomized Clinical Trial. *JAMA Psychiatry*. 2018.
16. Mansur CG, Myczkowki ML, de Barros Cabral S, Sartorelli Mdo C, Bellini BB, Dias AM, et al. Placebo effect after prefrontal magnetic stimulation in the treatment of resistant obsessive-compulsive disorder: a randomized controlled trial. *Int J Neuropsychopharmacol*. 2011;14(10):1389-97.
17. Dilkov D, Hawken ER, Kaludiev E, Milev R. Repetitive transcranial magnetic stimulation of the right dorsal lateral prefrontal cortex in the treatment of generalized anxiety disorder: A randomized, double-blind sham controlled clinical trial. *Prog Neuropsychopharmacol Biol Psychiatry*. 2017;78:61-5.

18. Tovar-Perdomo S, McGirr A, Van den Eynde F, Rodrigues Dos Santos N, Berlim MT. High frequency repetitive transcranial magnetic stimulation treatment for major depression: Dissociated effects on psychopathology and neurocognition. *J Affect Disord.* 2017;217:112-7.
19. Levkovitz Y, Harel EV, Roth Y, Braw Y, Most D, Katz LN, et al. Deep transcranial magnetic stimulation over the prefrontal cortex: evaluation of antidepressant and cognitive effects in depressive patients. *Brain Stimul.* 2009;2(4):188-200.
20. Tavares DF, Myczkowski ML, Alberto RL, Valiengo L, Rios RM, Gordon P, et al. Treatment of Bipolar Depression with Deep TMS: Results from a Double-Blind, Randomized, Parallel Group, Sham-Controlled Clinical Trial. *Neuropsychopharmacology.* 2017;42(13):2593-601.
21. Berlim MT, Van den Eynde F, Tovar-Perdomo S, Chachamovich E, Zangen A, Turecki G. Augmenting antidepressants with deep transcranial magnetic stimulation (DTMS) in treatment-resistant major depression. *World J Biol Psychiatry.* 2014;15(7):570-8.
22. Kaster TS, Daskalakis ZJ, Noda Y, Knyahnytska Y, Downar J, Rajji TK, et al. Efficacy, tolerability, and cognitive effects of deep transcranial magnetic stimulation for late-life depression: a prospective randomized controlled trial. *Neuropsychopharmacology.* 2018;43(11):2231-8.
23. Isserles M, Shalev AY, Roth Y, Peri T, Kutz I, Zlotnick E, et al. Effectiveness of deep transcranial magnetic stimulation combined with a brief exposure procedure in post-traumatic stress disorder--a pilot study. *Brain Stimul.* 2013;6(3):377-83.
24. Rosenberg O, Shoenfeld N, Zangen A, Kotler M, Dannon PN. Deep TMS in a resistant major depressive disorder: a brief report. *Depress Anxiety.* 2010;27(5):465-9.
25. Rosenberg O, Zangen A, Stryjer R, Kotler M, Dannon PN. Response to deep TMS in depressive patients with previous electroconvulsive treatment. *Brain Stimul.* 2010;3(4):211-7.
